# Supplementary material for: Flood-Induced Changes in Soil Microbial Functions as Modified by Plant Diversity
Source: PubMed Central journal article supplement (PMC5117659; doi:10.1371/journal.pone.0166349), 2016-11-21
Supplement: pone.0166349.s001.pdf [file pone.0166349.s001.pdf]

| Dataset | Basal respiration                                                 | Microbial biomass (Cmic)                         |
|---------|-------------------------------------------------------------------|--------------------------------------------------|
| Type    | raw                                                               | raw                                              |
| Unit    | [ $\mu\text{g O}_2\cdot\text{h}^{-1}\cdot\text{g soil dw}^{-1}$ ] | [ $\mu\text{g Cmic}\cdot\text{g soil dw}^{-1}$ ] |
| Date(s) | 2013-05-16                                                        |                                                  |
| Plot    |                                                                   |                                                  |
| B1 A01  | 3.77                                                              | 1249.94                                          |
| B1 A02  | 2.77                                                              | 946.85                                           |
| B1 A03  | 2.63                                                              | 957.69                                           |
| B1 A04  | 2.51                                                              | 2533.83                                          |
| B1 A05  | 1.39                                                              | 640.22                                           |
| B1 A06  | 2.73                                                              | 995.90                                           |
| B1 A07  | 1.61                                                              | 670.80                                           |
| B1 A08  | 1.36                                                              | 614.54                                           |
| B1 A13  | 2.19                                                              | 719.10                                           |
| B1 A14  | 3.28                                                              | 914.96                                           |
| B1 A16  | 1.63                                                              | 659.36                                           |
| B1 A17  | 1.70                                                              | 754.97                                           |
| B1 A17  | 1.70                                                              | 752.29                                           |
| B1 A18  | 2.49                                                              | 940.93                                           |
| B1 A19  | 3.32                                                              | 849.41                                           |
| B1 A20  | 4.00                                                              | 1353.31                                          |
| B1 A21  | 3.86                                                              | 1113.85                                          |
| B1 A22  | 3.79                                                              | 1216.21                                          |
| B2 A01  | 3.13                                                              | 939.97                                           |
| B2 A02  | 3.61                                                              | 935.41                                           |
| B2 A03  | 4.73                                                              | 1403.95                                          |
| B2 A04  | 2.40                                                              | 757.02                                           |
| B2 A05  |                                                                   | 859.39                                           |
| B2 A06  | 2.94                                                              | 1082.46                                          |
| B2 A08  | 2.55                                                              | 1181.74                                          |
| B2 A09  | 3.14                                                              | 1491.17                                          |
| B2 A10  | 3.96                                                              | 1258.89                                          |
| B2 A12  | 7.31                                                              | 2192.97                                          |
| B2 A13  | 4.90                                                              | 1694.04                                          |
| B2 A14  | 8.07                                                              | 2141.57                                          |
| B2 A15  | 4.22                                                              | 2072.05                                          |
| B2 A17  | 6.80                                                              | 2642.05                                          |
| B2 A18  | 7.29                                                              | 2673.18                                          |
| B2 A19  | 6.87                                                              | 2526.55                                          |
| B2 A20  | 6.41                                                              | 2368.96                                          |
| B2 A21  | 6.88                                                              | 2705.95                                          |
| B2 A22  | 9.13                                                              | 2540.41                                          |
| B3 A12  | 4.72                                                              | 2541.91                                          |
| B3 A14  | 8.46                                                              | 2473.18                                          |
| B3 A19  | 6.81                                                              | 2205.52                                          |
| B3 A21  | 4.02                                                              | 1987.85                                          |
| B3 A22  |                                                                   | 2592.49                                          |
| B3 A23  | 8.21                                                              |                                                  |
| B3 A24  | 8.30                                                              | 2167.28                                          |
| B3 A01  | 2.86                                                              | 883.12                                           |

|        |      |         |
|--------|------|---------|
| B3 A02 | 2.00 | 863.41  |
| B3 A03 | 2.47 | 1153.03 |
| B3 A04 | 3.61 | 1352.03 |
| B3 A05 | 4.01 | 1437.80 |
| B3 A06 |      | 1245.18 |
| B3 A07 | 2.93 | 1263.14 |
| B3 A09 | 3.84 | 1081.85 |
| B3 A11 | 4.14 | 1032.85 |
| B4 A01 | 4.46 | 1306.86 |
| B4 A02 | 3.79 | 1421.48 |
| B4 A04 | 3.54 | 1282.88 |
| B4 A05 |      | 1468.17 |
| B4 A06 | 3.61 | 1354.19 |
| B4 A08 | 3.19 | 977.00  |
| B4 A09 | 2.06 | 923.26  |
| B4 A10 | 2.78 | 1084.87 |
| B4 A11 | 3.50 | 1010.95 |
| B4 A12 | 3.25 | 910.34  |
| B4 A13 | 1.58 | 769.25  |
| B4 A14 | 2.42 | 951.93  |
| B4 A15 | 2.11 | 969.61  |
| B4 A16 | 2.12 | 976.06  |
| B4 A17 | 1.99 | 954.03  |
| B4 A18 | 3.87 | 1425.70 |
| B4 A20 | 2.79 | 1105.10 |
| B4 A21 | 2.47 | 983.47  |
| B4 A22 | 3.37 | 1054.50 |

|         |            |
|---------|------------|
| Date(s) | 2013-07-01 |
|---------|------------|

**Plot**

|       |      |         |
|-------|------|---------|
| B1A01 | 4.65 | 1179.53 |
| B1A02 | 5.53 | 1238.99 |
| B1A03 | 5.88 | 1265.81 |
| B1A04 | 5.28 | 1031.49 |
| B1A05 | 3.24 | 773.04  |
| B1A06 | 4.20 | 1272.90 |
| B1A07 | 3.33 | 1019.22 |
| B1A08 | 3.54 | 952.02  |
| B1A11 | 4.33 | 1200.52 |
| B1A12 | 3.12 | 886.53  |
| B1A13 | 5.34 | 849.68  |
| B1A14 | 5.29 | 1210.64 |
| B1A15 |      | 3914.54 |
| B1A16 | 3.41 | 949.00  |
| B1A17 | 3.21 | 827.14  |
| B1A18 | 2.30 | 659.34  |
| B1A19 | 3.74 | 879.94  |
| B1A20 | 3.83 | 1175.92 |
| B1A21 | 3.96 | 4078.45 |
| B1A22 | 5.07 | 1381.36 |
| B2A01 | 3.42 | 1080.82 |

|       |      |         |
|-------|------|---------|
| B2A02 | 4.72 | 1071.96 |
| B2A03 | 4.48 | 1147.63 |
| B2A04 |      | 4247.13 |
| B2A05 | 3.75 | 918.22  |
| B2A06 | 4.11 |         |
| B2A08 | 2.34 | 947.39  |
| B2A09 | 3.43 | 1184.80 |
| B2A10 | 3.71 | 1254.89 |
| B2A12 | 3.67 | 1241.56 |
| B2A13 | 2.82 | 798.22  |
| B2A14 |      | 4436.30 |
| B2A15 | 3.85 | 790.26  |
| B2A16 | 5.69 | 1444.90 |
| B2A17 | 5.21 | 1431.91 |
| B2A18 |      | 4282.44 |
| B2A19 | 4.02 | 1257.71 |
| B2A20 | 3.80 | 1284.42 |
| B2A21 | 4.69 | 1448.85 |
| B2A22 | 6.37 | 1569.34 |
| B3A01 | 2.30 | 986.40  |
| B3A02 | 1.71 | 945.94  |
| B3A03 | 4.50 | 1304.00 |
| B3A04 | 3.58 | 706.72  |
| B3A05 | 4.69 | 1234.96 |
| B3A06 | 3.51 | 1042.32 |
| B3A07 | 4.29 | 1274.64 |
| B3A08 | 2.84 | 1042.03 |
| B3A09 | 4.13 | 1196.25 |
| B3A11 | 3.44 | 1004.40 |
| B3A12 | 6.33 | 1306.05 |
| B3A13 | 3.21 | 1091.04 |
| B3A14 | 3.33 | 1273.86 |
| B3A16 | 5.99 | 1359.26 |
| B3A17 | 2.96 | 1041.19 |
| B3A19 | 2.83 | 1023.81 |
| B3A20 | 2.57 | 1005.64 |
| B3A21 | 2.72 | 1068.55 |
| B3A22 | 3.33 | 1284.63 |
| B3A23 | 2.68 | 1369.23 |
| B3A24 | 3.62 | 1297.87 |
| B4A01 | 3.50 | 1207.52 |
| B4A02 |      |         |
| B4A04 | 4.32 | 1208.07 |
| B4A06 | 3.44 | 921.72  |
| B4A07 | 4.49 | 1072.38 |
| B4A08 | 2.55 | 955.57  |
| B4A09 | 2.41 | 895.14  |
| B4A10 | 3.48 | 1377.37 |
| B4A11 | 3.19 | 1167.78 |
| B4A12 | 2.38 | 852.41  |

|       |      |         |
|-------|------|---------|
| B4A13 | 1.81 | 1008.13 |
| B4A14 |      |         |
| B4A15 | 3.89 | 1511.37 |
| B4A16 | 3.15 | 1439.37 |
| B4A17 | 2.57 | 1130.01 |
| B4A18 | 5.13 | 1428.55 |
| B4A20 | 2.85 | 1158.55 |
| B4A21 | 3.06 | 1010.41 |
| B4A22 | 2.64 | 1107.95 |

|         |            |
|---------|------------|
| Date(s) | 2013-09-17 |
|---------|------------|

|             |
|-------------|
| <b>Plot</b> |
|-------------|

|       |      |         |
|-------|------|---------|
| B1A01 | 3.97 | 1147.68 |
| B1A02 | 3.50 | 865.15  |
| B1A03 | 3.63 | 908.42  |
| B1A04 | 7.50 | 1010.73 |
| B1A05 | 2.70 | 572.03  |
| B1A06 | 4.02 | 981.85  |
| B1A07 | 4.63 | 1000.60 |
| B1A08 | 2.83 | 732.41  |
| B1A11 | 3.87 | 1016.60 |
| B1A12 | 4.38 | 1017.33 |
| B1A13 | 2.63 | 649.09  |
| B1A14 |      |         |
| B1A15 | 2.72 | 696.64  |
| B1A16 |      | 986.56  |
| B1A17 | 3.48 | 775.60  |
| B1A18 | 2.60 |         |
| B1A19 | 4.16 | 1068.63 |
| B1A20 | 3.95 | 1056.64 |
| B1A21 | 3.10 | 985.04  |
| B1A22 | 4.56 | 1153.17 |
| B2A01 |      |         |
| B2A02 | 4.37 | 894.57  |
| B2A03 | 4.46 | 1107.48 |
| B2A04 | 2.02 | 512.20  |
| B2A05 | 2.13 | 571.08  |
| B2A06 | 3.21 | 999.59  |
| B2A08 | 2.50 | 907.10  |
| B2A09 | 3.86 | 1107.18 |
| B2A10 | 5.74 | 1562.30 |
| B2A12 |      |         |
| B2A13 | 3.79 | 812.98  |
| B2A14 | 4.45 | 1275.09 |
| B2A15 | 3.41 | 769.95  |
| B2A16 |      |         |
| B2A17 | 4.76 | 1343.24 |
| B2A18 | 4.84 | 1456.61 |
| B2A19 | 4.38 | 1215.17 |
| B2A20 | 6.20 | 1316.44 |
| B2A21 | 4.37 | 1364.72 |

|       |      |         |
|-------|------|---------|
| B2A22 | 5.28 | 1373.46 |
| B3A01 | 2.99 | 960.21  |
| B3A02 | 2.24 | 773.73  |
| B3A03 | 3.20 | 1135.43 |
| B3A04 | 3.25 | 911.57  |
| B3A05 | 3.19 | 926.20  |
| B3A06 | 3.33 | 1001.11 |
| B3A07 | 2.90 | 1137.70 |
| B3A08 |      |         |
| B3A09 | 3.93 | 1222.63 |
| B3A11 | 2.90 | 792.64  |
| B3A12 | 2.26 | 786.17  |
| B3A13 | 3.29 | 923.13  |
| B3A14 | 3.67 | 1186.91 |
| B3A16 | 2.65 | 848.89  |
| B3A17 | 2.65 | 848.89  |
| B3A19 | 3.61 | 996.48  |
| B3A20 | 3.00 | 948.56  |
| B3A21 | 6.48 | 955.37  |
| B3A22 | 4.86 | 1476.15 |
| B3A23 | 4.60 | 1409.03 |
| B3A24 | 3.63 | 1110.62 |
| B4A01 | 3.98 | 1341.10 |
| B4A02 | 5.25 | 1228.54 |
| B4A04 | 5.32 | 1139.88 |
| B4A06 | 3.80 | 1245.93 |
| B4A07 |      |         |
| B4A08 | 4.60 | 1085.46 |
| B4A09 | 3.72 | 1050.68 |
| B4A10 | 3.58 | 1188.64 |
| B4A11 |      |         |
| B4A12 | 2.87 | 835.72  |
| B4A13 | 2.06 | 680.88  |
| B4A14 | 3.67 | 1285.16 |
| B4A15 | 3.04 | 1051.66 |
| B4A16 | 3.29 | 1102.07 |
| B4A17 | 2.57 | 862.63  |
| B4A18 | 5.10 | 1533.96 |
| B4A20 | 3.73 | 1270.68 |
| B4A21 | 3.06 | 891.35  |
| B4A22 | 3.69 | 978.93  |
