# Supplementary material for: Flood-Induced Changes in Soil Microbial Functions as Modified by Plant Diversity
Source: PubMed Central journal article supplement (PMC5117659; doi:10.1371/journal.pone.0166349), 2016-11-21
Supplement: pone.0166349.s002.pdf [file pone.0166349.s002.pdf]

| <b>Dataset</b> | Microbial growth after addition of Glucose | Microbial growth after the addition of Glucose and Nitrogen | Microbial growth after the addition of Glucose and Phosphorus | Microbial growth after the addition of Glucose, Nitrogen and Phosphorus |
|----------------|--------------------------------------------|-------------------------------------------------------------|---------------------------------------------------------------|-------------------------------------------------------------------------|
| Unit           | Slopes of microbial growth                 |                                                             |                                                               |                                                                         |
| Type           | raw                                        | raw                                                         | raw                                                           | raw                                                                     |
| Date(s)        | 2013-05-16;                                |                                                             |                                                               |                                                                         |
| <b>Plot</b>    |                                            |                                                             |                                                               |                                                                         |
| B1A01          | -0.01                                      | 0.01                                                        | 0.02                                                          | 0.08                                                                    |
| B1A02          | 0.03                                       | 0.07                                                        | 0.04                                                          | 0.11                                                                    |
| B1A03          | 0.02                                       | 0.03                                                        | 0.03                                                          | 0.12                                                                    |
| B1A04          | 0.04                                       | 0.08                                                        | 0.06                                                          | 0.11                                                                    |
| B1A05          | 0.04                                       | 0.08                                                        | 0.08                                                          | 0.15                                                                    |
| B1A06          | 0.05                                       | 0.08                                                        | 0.02                                                          | 0.11                                                                    |
| B1A07          | 0.01                                       | 0.08                                                        | 0.04                                                          | 0.13                                                                    |
| B1A08          | 0.04                                       | 0.05                                                        | 0.05                                                          | 0.11                                                                    |
| B1A11          | 0                                          | 0.06                                                        | 0.01                                                          | 0.09                                                                    |
| B1A12          | 0.01                                       | 0.01                                                        | 0.04                                                          | 0.11                                                                    |
| B1A13          | 0.03                                       | 0.03                                                        | 0.05                                                          | 0.1                                                                     |
| B1A14          | 0                                          | 0.06                                                        | 0.02                                                          | 0.13                                                                    |
| B1A15          | 0.03                                       | 0.09                                                        | 0.04                                                          | 0.11                                                                    |
| B1A16          | 0.03                                       | 0.09                                                        | 0.03                                                          | 0.12                                                                    |
| B1A17          | 0.04                                       | 0.1                                                         | 0.05                                                          | 0.13                                                                    |
| B1A18          | 0.03                                       | 0.09                                                        | 0.04                                                          | 0.09                                                                    |
| B1A19          | 0.05                                       | 0.09                                                        | 0.08                                                          | 0.11                                                                    |
| B1A20          | 0                                          | 0.04                                                        | 0.02                                                          | 0.07                                                                    |
| B1A21          | 0.02                                       | 0.06                                                        | 0.03                                                          | 0.09                                                                    |
| B1A22          | -0.02                                      | 0.03                                                        | -0.02                                                         |                                                                         |
| B2A01          | 0.02                                       | 0.04                                                        | 0.03                                                          | 0.1                                                                     |
| B2A02          | 0.01                                       | 0.03                                                        | 0.01                                                          | 0.12                                                                    |
| B2A03          | 0.01                                       | 0.03                                                        | 0.02                                                          | 0.07                                                                    |
| B2A04          | 0.05                                       | 0.09                                                        | 0.06                                                          | 0.12                                                                    |
| B2A05          | 0.04                                       | 0.1                                                         | 0.06                                                          | 0.1                                                                     |
| B2A06          | 0.03                                       | 0.07                                                        |                                                               |                                                                         |
| B2A08          | 0.04                                       | 0.08                                                        | 0.04                                                          | 0.11                                                                    |
| B2A09          | 0.01                                       | 0.06                                                        | 0.02                                                          | 0.08                                                                    |
| B2A10          | 0                                          | 0.04                                                        | -0.02                                                         | 0.07                                                                    |
| B2A12          | 0.03                                       | 0.05                                                        | 0.03                                                          | 0.09                                                                    |
| B2A13          | 0.02                                       | 0.03                                                        | 0.05                                                          | 0.12                                                                    |
| B2A14          | 0.02                                       | 0.06                                                        | 0.05                                                          | 0.13                                                                    |
| B2A15          | 0.04                                       | 0.05                                                        | 0.05                                                          | 0.13                                                                    |
| B2A16          | 0.03                                       | 0.08                                                        | 0.02                                                          |                                                                         |
| B2A17          | 0.02                                       | 0.06                                                        | 0.02                                                          | 0.08                                                                    |
| B2A18          | 0.02                                       | 0.1                                                         | 0.03                                                          | 0.1                                                                     |
| B2A19          | 0.03                                       | 0.08                                                        |                                                               | 0.11                                                                    |
| B2A20          | 0.02                                       | 0.06                                                        | 0.04                                                          | 0.09                                                                    |
| B2A21          | 0.01                                       | 0.04                                                        | 0.02                                                          | 0.07                                                                    |
| B2A22          | 0.01                                       | 0.02                                                        | 0.03                                                          | 0.09                                                                    |
| B3A01          | 0.01                                       | 0.02                                                        | 0.02                                                          | 0.1                                                                     |

|       |       |      |       |      |
|-------|-------|------|-------|------|
| B3A02 | 0.02  | 0.05 | 0.04  | 0.11 |
| B3A03 | 0     | 0.01 | 0.02  | 0.08 |
| B3A04 | 0.01  | 0.07 | 0     | 0.1  |
| B3A05 | -0.01 | 0.05 | 0.01  |      |
| B3A06 | 0.01  | 0.09 | 0.04  | 0.1  |
| B3A07 | 0.02  | 0.09 | 0.06  | 0.12 |
| B3A08 | 0.06  | 0.1  | 0.06  | 0.13 |
| B3A09 | -0.02 | 0.07 | -0.02 | 0.1  |
| B3A11 | -0.02 | 0.07 | -0.02 | 0.1  |
| B3A12 | 0.06  | 0.08 | 0.06  | 0.11 |
| B3A13 | 0.02  |      | 0.02  | 0.09 |
| B3A14 | -0.03 | 0.01 | -0.02 | 0.06 |
| B3A16 | 0.02  | 0.03 | 0.02  | 0.08 |
| B3A17 | 0.04  | 0.07 |       |      |
| B3A19 | 0.04  | 0.09 | 0.04  | 0.1  |
| B3A20 | 0.03  | 0.06 | 0.03  | 0.08 |
| B3A21 | 0.04  | 0.06 | 0.05  | 0.09 |
| B3A22 | 0.01  | 0.04 | 0.01  |      |
| B3A23 | 0.01  | 0.04 | 0.02  | 0.06 |
| B3A24 | 0.01  | 0.06 | 0.03  | 0.07 |
| B4A01 | 0     | 0.01 | 0.01  | 0.09 |
| B4A02 | -0.02 | 0.05 | -0.02 | 0.09 |
| B4A04 | -0.02 | 0.03 | -0.02 | 0.07 |
| B4A06 | 0.01  | 0.06 | 0.03  | 0.09 |
| B4A07 | 0.01  | 0.01 | 0.04  | 0.07 |
| B4A08 | -0.03 | 0.08 | -0.02 | 0.1  |
| B4A09 | 0.01  | 0.04 | 0.05  | 0.09 |
| B4A10 | -0.02 | 0.05 | -0.02 | 0.09 |
| B4A11 | 0.02  | 0.02 | 0.04  | 0.1  |
| B4A12 | 0.04  | 0.08 | 0.05  | 0.14 |
| B4A13 | 0.03  | 0.06 | 0.05  | 0.1  |
| B4A14 | 0.04  | 0.07 | 0.04  | 0.11 |
| B4A15 | 0.02  | 0.04 | 0.04  | 0.08 |
| B4A16 | 0     | 0.07 | 0.01  | 0.08 |
| B4A17 | 0.04  | 0.08 | 0.04  | 0.1  |
| B4A18 | 0.02  | 0.04 | 0.02  | 0.07 |
| B4A20 | 0.02  | 0.05 |       | 0.1  |
| B4A21 | 0.03  | 0.04 | 0.06  |      |
| B4A22 | 0.01  | 0.07 | 0     |      |

|         |             |
|---------|-------------|
| Date(s) | 2013-07-01; |
| Plot    |             |

|       |      |      |      |      |
|-------|------|------|------|------|
| B1A01 | 0.01 | 0.02 | 0.04 | 0.1  |
| B1A02 | 0.03 | 0.07 | 0.05 | 0.1  |
| B1A03 | 0.03 | 0.05 | 0.05 | 0.1  |
| B1A04 | 0.03 | 0.05 | 0.03 | 0.09 |
| B1A05 | 0.03 | 0.08 | 0.04 | 0.12 |
| B1A06 | 0.02 | 0.04 | 0.03 | 0.08 |
| B1A07 | 0.02 | 0.07 | 0.03 | 0.1  |
| B1A08 | 0.02 | 0.05 | 0.03 | 0.09 |
| B1A11 | 0.02 | 0.04 | 0.03 | 0.08 |

|       |      |      |      |      |
|-------|------|------|------|------|
| B1A12 | 0.02 | 0.02 | 0.04 | 0.09 |
| B1A13 | 0.05 | 0.05 | 0.08 | 0.12 |
| B1A14 | 0.04 | 0.07 | 0.05 | 0.08 |
| B1A15 | 0.05 | 0.08 | 0.04 | 0.11 |
| B1A16 | 0.03 | 0.08 | 0.05 | 0.11 |
| B1A17 | 0.03 | 0.08 | 0.05 | 0.11 |
| B1A18 | 0.02 | 0.08 | 0.03 | 0.1  |
| B1A19 | 0.01 | 0.07 | 0.02 | 0.12 |
| B1A20 | 0.01 | 0.03 | 0.04 | 0.08 |
| B1A21 | 0.03 | 0.05 | 0.03 | 0.09 |
| B1A22 | 0.02 | 0.03 | 0.03 | 0.08 |
| B2A01 | 0.01 | 0.02 | 0.03 | 0.06 |
| B2A02 | 0.03 | 0.04 | 0.04 | 0.09 |
| B2A03 | 0.02 | 0.04 | 0.04 | 0.08 |
| B2A04 | 0.06 | 0.05 | 0.06 | 0.09 |
| B2A05 | 0.04 | 0.07 | 0.05 | 0.1  |
| B2A06 | 0.03 | 0.04 | 0.04 | 0.07 |
| B2A08 | 0.01 | 0.07 | 0.02 | 0.08 |
| B2A09 | 0.01 | 0.03 | 0.02 | 0.04 |
| B2A10 | 0.02 | 0.04 | 0.03 | 0.06 |
| B2A12 | 0.04 | 0.06 | 0.06 | 0.11 |
| B2A13 | 0.04 | 0.05 | 0.07 | 0.1  |
| B2A14 | 0.03 | 0.04 | 0.02 | 0.08 |
| B2A15 | 0.07 | 0.07 | 0.05 | 0.11 |
| B2A16 | 0.03 | 0.05 | 0.04 | 0.07 |
| B2A17 | 0.04 | 0.05 | 0.05 | 0.08 |
| B2A18 | 0.04 | 0.04 | 0.04 | 0.07 |
| B2A19 | 0.02 | 0.05 | 0.03 | 0.12 |
| B2A20 | 0.02 | 0.05 | 0.03 | 0.11 |
| B2A21 | 0.02 | 0.03 | 0.02 | 0.13 |
| B2A22 | 0.03 | 0.04 | 0.03 | 0.07 |
| B3A01 | 0.03 | 0.03 | 0.06 | 0.1  |
| B3A02 | 0.04 | 0.04 | 0.06 | 0.1  |
| B3A03 | 0.02 | 0.02 | 0.04 | 0.07 |
| B3A04 | 0.04 | 0.07 | 0.06 | 0.1  |
| B3A05 | 0.03 | 0.05 | 0.05 | 0.08 |
| B3A06 | 0.04 | 0.09 | 0.05 | 0.22 |
| B3A07 | 0.03 | 0.05 | 0.04 | 0.16 |
| B3A08 | 0.03 | 0.08 | 0.04 | 0.19 |
| B3A09 | 0    | 0.06 | 0.02 | 0.08 |
| B3A11 | 0    | 0.06 | 0.02 | 0.09 |
| B3A12 | 0.03 | 0.06 | 0.04 | 0.08 |
| B3A13 | 0.02 | 0.03 | 0.03 | 0.08 |
| B3A14 | 0.02 | 0.03 | 0.03 | 0.05 |
| B3A16 | 0.04 | 0.05 | 0.04 | 0.07 |
| B3A17 | 0.05 | 0.07 | 0.06 | 0.1  |
| B3A19 | 0.04 | 0.07 | 0.05 | 0.1  |
| B3A20 | 0.03 | 0.05 | 0.04 | 0.09 |
| B3A21 | 0.03 | 0.05 | 0.05 | 0.09 |
| B3A22 | 0    | 0.04 | 0.02 | 0.06 |

|       |       |      |       |      |
|-------|-------|------|-------|------|
| B3A23 | -0.01 | 0.02 | 0.02  | 0.07 |
| B3A24 | 0.02  | 0.05 | 0.04  | 0.05 |
| B4A01 | 0     | 0.01 | 0.02  | 0.05 |
| B4A02 | 0.03  | 0.04 | 0.05  | 0.09 |
| B4A04 | 0.01  | 0.02 | 0.03  | 0.07 |
| B4A06 | 0.04  | 0.06 | 0.04  | 0.08 |
| B4A07 | 0.01  | 0.02 | 0.05  | 0.08 |
| B4A08 | 0.03  | 0.04 | 0.04  | 0.1  |
| B4A09 | 0.01  | 0.01 | 0.03  | 0.08 |
| B4A10 | -0.02 | 0.04 | -0.02 | 0.09 |
| B4A11 | 0.02  | 0.05 | 0.04  | 0.11 |
| B4A12 | 0.05  | 0.07 | 0.06  | 0.12 |
| B4A13 | -0.01 | 0.05 | 0.02  | 0.1  |
| B4A14 | 0.03  | 0.06 | 0.04  | 0.09 |
| B4A15 | 0     | 0.03 | 0.02  | 0.09 |
| B4A16 | 0.02  | 0.04 | 0.03  | 0.08 |
| B4A17 | 0     | 0.02 | 0.02  | 0.09 |
| B4A18 | 0.01  |      | -0.02 | 0.07 |
| B4A20 | 0.01  |      | 0.02  | 0.1  |
| B4A21 | 0.02  |      | 0.03  | 0.1  |
| B4A22 | 0     |      | 0.01  | 0.09 |

|         |             |
|---------|-------------|
| Date(s) | 2013-09-17; |
|---------|-------------|

|      |  |
|------|--|
| Plot |  |
|------|--|

|       |       |      |       |      |
|-------|-------|------|-------|------|
| B1A01 | 0.01  | 0.01 | 0.02  | 0.08 |
| B1A02 | 0.02  | 0.06 | 0.02  | 0.1  |
| B1A03 | 0.03  | 0.05 | 0.03  | 0.1  |
| B1A04 | 0.03  | 0.05 | 0.04  | 0.09 |
| B1A05 | 0.06  | 0.09 | 0.06  | 0.11 |
| B1A06 | 0.01  | 0.05 | 0.01  | 0.08 |
| B1A07 | 0.02  | 0.07 | 0.02  | 0.1  |
| B1A08 | 0.04  | 0.06 | 0.04  | 0.1  |
| B1A11 | 0.01  | 0.04 | 0.01  | 0.07 |
| B1A12 | 0.02  | 0.02 | 0.03  | 0.08 |
| B1A13 | 0.04  | 0.05 | 0.04  | 0.11 |
| B1A14 | -0.02 | 0.04 | 0     | 0.07 |
| B1A15 | 0.04  | 0.08 | 0.05  | 0.11 |
| B1A16 | 0.04  | 0.07 | 0.04  | 0.09 |
| B1A17 | 0.03  | 0.07 | 0.03  | 0.1  |
| B1A18 | 0.03  | 0.07 | 0.03  | 0.1  |
| B1A19 | 0     | 0.06 | -0.02 | 0.07 |
| B1A20 | 0.01  | 0.03 | 0.01  | 0.06 |
| B1A21 | 0.02  | 0.04 | 0.02  | 0.07 |
| B1A22 | 0.01  | 0.02 | 0.03  | 0.06 |
| B2A01 | 0.01  | 0.02 | 0.02  | 0.08 |
| B2A02 | 0.02  | 0.05 | -0.03 | 0.1  |
| B2A03 | 0.01  | 0.03 | 0.01  | 0.06 |
| B2A04 | 0.05  | 0.09 | 0.04  | 0.13 |
| B2A05 | 0.04  | 0.08 | 0.03  | 0.11 |
| B2A06 | 0.02  | 0.04 | 0.01  | 0.06 |
| B2A08 | 0.01  | 0.05 | 0.01  | 0.08 |

|       |       |      |       |      |
|-------|-------|------|-------|------|
| B2A09 | 0.01  | 0.03 | 0.02  | 0.04 |
| B2A10 | -0.02 | 0.03 | -0.02 | 0.06 |
| B2A12 | 0.02  | 0.05 | 0.03  | 0.1  |
| B2A13 | 0.03  | 0.04 | 0.02  | 0.1  |
| B2A14 | 0.01  | 0.04 | 0.02  | 0.06 |
| B2A15 | 0.05  | 0.08 | 0.05  | 0.13 |
| B2A16 | 0.03  | 0.04 | 0.03  | 0.04 |
| B2A17 | 0.02  | 0.05 | 0.02  | 0.06 |
| B2A18 | 0.01  | 0.04 | 0.01  | 0.05 |
| B2A19 | 0.01  | 0.04 | 0.01  | 0.06 |
| B2A20 | 0.03  | 0.05 | 0.03  | 0.07 |
| B2A21 | 0.01  | 0.03 | 0.01  | 0.06 |
| B2A22 | 0.02  | 0.03 | 0.03  | 0.05 |
| B3A01 | 0.02  | 0.02 | 0.03  | 0.08 |
| B3A02 | 0.03  | 0.03 | 0.04  | 0.1  |
| B3A03 | 0.03  | 0.03 | 0.02  | 0.07 |
| B3A04 | 0.03  | 0.07 | 0.03  | 0.08 |
| B3A05 | 0.02  | 0.05 | 0.02  | 0.07 |
| B3A06 | 0.02  | 0.05 | 0.02  | 0.08 |
| B3A07 | 0.03  | 0.05 | 0.02  | 0.05 |
| B3A08 | 0.04  | 0.08 | 0.03  | 0.11 |
| B3A09 | 0.02  | 0.06 | 0.01  | 0.08 |
| B3A11 | -0.01 | 0.05 | -0.02 | 0.08 |
| B3A12 | 0.05  | 0.08 | 0.07  | 0.09 |
| B3A13 | -0.01 | 0.03 | -0.02 | 0.09 |
| B3A14 | 0.02  | 0.02 | 0.02  | 0.07 |
| B3A16 | 0.03  | 0.04 | 0.03  | 0.07 |
| B3A17 | 0.05  | 0.07 | 0.04  | 0.11 |
| B3A19 | 0.03  | 0.07 | 0.03  | 0.09 |
| B3A20 | 0.03  | 0.06 | 0.02  | 0.09 |
| B3A21 | 0.04  | 0.05 | 0.04  | 0.09 |
| B3A22 | 0.02  | 0.05 | 0.02  | 0.05 |
| B3A23 | 0.02  | 0.08 | 0.02  | 0.06 |
| B3A24 | 0.04  | 0.06 | 0.02  | 0.07 |
| B4A01 | -0.02 | 0.01 | -0.02 | 0.07 |
| B4A02 | 0     | 0.04 | 0.01  | 0.07 |
| B4A04 | 0.01  | 0.02 | -0.02 | 0.07 |
| B4A06 | 0.02  | 0.05 | 0.02  | 0.08 |
| B4A07 | 0.02  | 0.02 | 0.03  | 0.08 |
| B4A08 | -0.01 | 0.03 | 0.01  | 0.1  |
| B4A09 | 0.02  | 0.02 | 0.04  | 0.08 |
| B4A10 | -0.02 | 0.04 | -0.02 | 0.09 |
| B4A11 | 0.02  | 0.05 | 0.02  | 0.09 |
| B4A12 | 0.05  | 0.07 | 0.05  | 0.1  |
| B4A13 | 0.03  | 0.06 | 0.03  | 0.13 |
| B4A14 | 0.01  | 0.05 | 0.02  | 0.09 |
| B4A15 | 0.03  | 0.04 | 0.04  | 0.09 |
| B4A16 | -0.02 | 0.04 | -0.01 | 0.12 |
| B4A17 | 0.04  | 0.07 | 0.04  | 0.1  |
| B4A18 | 0.02  | 0.02 | 0.02  | 0.09 |

|       |      |      |      |      |
|-------|------|------|------|------|
| B4A20 | 0.03 | 0.02 | 0.03 | 0.08 |
| B4A21 | 0.02 | 0.02 | 0.03 | 0.09 |
| B4A22 | 0.02 | 0.06 | 0.01 | 0.08 |
