# Supplementary material for: Flood-Induced Changes in Soil Microbial Functions as Modified by Plant Diversity
Source: PubMed Central journal article supplement (PMC5117659; doi:10.1371/journal.pone.0166349), 2016-11-21
Supplement: pone.0166349.s003.pdf [file pone.0166349.s003.pdf]

## Dataset

| Enzyme activity of | Phenol oxidase                       | Peroxidase                           | Arginine protease                    | Glucosaminidase                      | Glucuronidase                        |
|--------------------|--------------------------------------|--------------------------------------|--------------------------------------|--------------------------------------|--------------------------------------|
| Type               | raw                                  | raw                                  | raw                                  | raw                                  | raw                                  |
| Unit               | nmol g <sup>-1</sup> h <sup>-1</sup> | nmol g <sup>-1</sup> h <sup>-1</sup> | nmol g <sup>-1</sup> h <sup>-1</sup> | nmol g <sup>-1</sup> h <sup>-1</sup> | nmol g <sup>-1</sup> h <sup>-1</sup> |
| Date(s)            | 2013-05-16;                          | 2013-05-16;                          | 2013-05-16;                          | 2013-05-16;                          | 2013-05-16;                          |
| Plot               |                                      |                                      |                                      |                                      |                                      |
| B1A01              | 0.04                                 | 0.05                                 | 24659.58                             | 721.10                               | 76.49                                |
| B1A02              | 0.04                                 | 0.05                                 | 21160.03                             | 166.20                               | -24.01                               |
| B1A03              | 0.04                                 | 0.06                                 | 21268.80                             | -8.67                                | 72.34                                |
| B1A04              | 0.04                                 | 0.06                                 | 15413.54                             | 293.09                               | 31.39                                |
| B1A05              | 0.04                                 | 0.04                                 |                                      |                                      |                                      |
| B1A06              | 0.05                                 | 0.05                                 | 23809.17                             | 418.21                               | 67.50                                |
| B1A07              | 0.04                                 | 0.06                                 | 16926.45                             | 155.77                               | -81.71                               |
| B1A08              | 0.04                                 | 0.05                                 | 13528.47                             | 202.96                               | 15.21                                |
| B1A11              | 0.04                                 | 0.06                                 | 26828.39                             | 379.57                               | 141.38                               |
| B1A12              | 0.04                                 | 0.06                                 | 17868.46                             | 53.99                                | 19.05                                |
| B1A13              | 0.05                                 | 0.05                                 | 14205.15                             | 200.04                               | -35.33                               |
| B1A14              | 0.04                                 | 0.05                                 | 21616.82                             | 52.05                                | -17.89                               |
| B1A15              | 0.04                                 | 0.06                                 | 13492.09                             | 217.77                               | -33.40                               |
| B1A16              | 0.05                                 | 0.06                                 | 18244.57                             | 90.47                                | 23.63                                |
| B1A17              | 0.05                                 | 0.06                                 | 11961.71                             | 187.22                               | -45.01                               |
| B1A18              | 0.05                                 | 0.06                                 | 15963.27                             | 191.54                               | 60.51                                |
| B1A19              | 0.05                                 | 0.05                                 | 21155.58                             | 363.17                               | 42.01                                |
| B1A20              | 0.05                                 | 0.05                                 | 22536.86                             | 485.52                               | 142.89                               |
| B1A21              | 0.04                                 | 0.06                                 | 17573.44                             | 376.88                               | 26.67                                |
| B1A22              | 0.04                                 | 0.06                                 | 28219.75                             | 227.24                               | -1.44                                |
| B2A01              | 0.05                                 | 0.05                                 | 20225.57                             | 338.38                               | 343.39                               |
| B2A02              | 0.03                                 | 0.05                                 | 19809.17                             | 398.69                               | 352.71                               |
| B2A03              | 0.05                                 | 0.06                                 | 25679.98                             | 455.61                               | 400.05                               |
| B2A04              | 0.04                                 | 0.06                                 | 14368.84                             | 314.24                               | 240.98                               |
| B2A05              | 0.03                                 | 0.06                                 | 14313.09                             | 230.73                               | 319.44                               |
| B2A06              | 0.02                                 | 0.05                                 | 25679.98                             | 529.17                               | 400.05                               |
| B2A08              | 0.03                                 | 0.06                                 | 14782.08                             | 440.98                               | 418.39                               |
| B2A09              | 0.04                                 | 0.05                                 | 18698.95                             | 484.21                               | 662.09                               |
| B2A10              | 0.03                                 | 0.06                                 | 31255.20                             | 628.76                               | 541.80                               |
| B2A12              | 0.04                                 | 0.06                                 | 26744.38                             | 305.30                               | 437.85                               |
| B2A13              | 0.02                                 | 0.05                                 | 26744.38                             | 156.49                               | 437.85                               |
| B2A14              | 0.02                                 | 0.06                                 | 10630.89                             | 496.88                               | 199.07                               |
| B2A15              | 0.01                                 | 0.05                                 | 10630.89                             | 191.01                               | 199.07                               |
| B2A16              |                                      |                                      | 15740.73                             | 200.56                               | 222.55                               |
| B2A17              |                                      |                                      | 31255.20                             | 353.31                               | 541.80                               |
| B2A18              |                                      |                                      | 14368.84                             | 485.61                               | 240.98                               |
| B2A19              |                                      |                                      | 17194.94                             | 482.17                               | 95.21                                |
| B2A20              |                                      |                                      | 20449.80                             | 310.03                               | 503.86                               |
| B2A21              |                                      |                                      | 20449.80                             | 630.21                               | 503.86                               |
| B2A22              |                                      |                                      | 14313.09                             | 728.56                               | 319.44                               |
| B3A01              |                                      |                                      | 10328.46                             | 346.27                               | 369.74                               |
| B3A02              |                                      |                                      | 13822.99                             | 286.53                               | 453.97                               |
| B3A03              |                                      |                                      | 14349.67                             | 303.78                               | 390.14                               |

|       |  |  |          |         |        |
|-------|--|--|----------|---------|--------|
| B3A04 |  |  | 13822.73 | 640.99  | 418.03 |
| B3A05 |  |  | 22831.18 | 499.08  | 667.28 |
| B3A06 |  |  | 12449.94 | 348.32  | 509.42 |
| B3A07 |  |  | 7670.46  | 350.01  | 260.73 |
| B3A08 |  |  | 13078.88 | 397.97  | 508.83 |
| B3A09 |  |  | 13691.05 | 325.76  | 475.26 |
| B3A11 |  |  | 19748.96 | 630.81  | 644.52 |
| B3A12 |  |  | 10700.30 | 192.63  | 310.43 |
| B3A13 |  |  | 16483.43 | 564.08  | 500.54 |
| B3A14 |  |  | 21168.45 | 768.56  | 676.68 |
| B3A16 |  |  | 16078.61 | 844.37  | 622.77 |
| B3A17 |  |  | 11300.06 | 219.73  | 395.03 |
| B3A19 |  |  | 13746.42 | 479.00  | 561.58 |
| B3A20 |  |  | 15231.92 | 467.26  | 529.39 |
| B3A21 |  |  | 12285.36 | 375.37  | 268.82 |
| B3A22 |  |  | 17845.89 | 480.91  | 719.03 |
| B3A23 |  |  | 29244.63 | 537.73  | 676.40 |
| B3A24 |  |  | 20409.57 | 654.87  | 546.20 |
| B4A01 |  |  | 18758.62 | 1054.25 | 800.61 |
| B4A02 |  |  | 21338.42 | 798.68  | 758.79 |
| B4A04 |  |  | 15133.89 | 905.54  | 699.60 |
| B4A06 |  |  | 18816.55 | -46.50  | 880.94 |
| B4A07 |  |  | 17825.14 | 857.58  | 689.78 |
| B4A08 |  |  | 14968.93 | 630.60  | 503.39 |
| B4A09 |  |  | 12609.25 | 830.41  | 679.67 |
| B4A10 |  |  | 13502.43 | 1069.04 | 916.01 |
| B4A11 |  |  | 15830.45 | 751.20  | 736.57 |
| B4A12 |  |  | 13129.30 | 519.99  | 454.36 |
| B4A13 |  |  | 12018.55 | 388.72  | 507.84 |
| B4A14 |  |  | 13862.46 | 539.77  | 710.39 |
| B4A15 |  |  | 13805.02 | 501.09  | 904.94 |
| B4A16 |  |  | 18452.70 | 540.30  | 754.67 |
| B4A17 |  |  | 10650.09 | 751.35  | 539.84 |
| B4A18 |  |  | 17496.58 | 1030.02 | 988.37 |
| B4A20 |  |  | 14409.27 | 708.16  | 741.77 |
| B4A21 |  |  | 11224.26 | 369.21  | 421.57 |
| B4A22 |  |  | 12355.05 | 717.57  | 843.17 |

| Date(s) | 2013-07-01; | 2013-07-01; | 2013-07-01; | 2013-07-01; | 2013-07-01; |
|---------|-------------|-------------|-------------|-------------|-------------|
| Plot    |             |             |             |             |             |
| B1A01   | 0.03        | 0.05        | 50040.39    | 1481.78     | 154.27      |
| B1A02   |             |             | 39557.78    | 275.67      | 207.40      |
| B1A03   | 0.03        | 0.05        | 35495.94    | 2165.28     | 202.38      |
| B1A04   | 0.03        | 0.05        | 30199.96    | 1114.57     | 198.39      |
| B1A05   | 0.04        | 0.05        | 31269.72    | 960.07      | 87.30       |
| B1A06   |             |             | 37115.49    | 893.30      | 236.24      |
| B1A07   | 0.03        | 0.05        | 36540.16    | 588.35      | 212.41      |
| B1A08   | 0.03        | 0.05        | 24512.31    | 1135.41     | 131.57      |
| B1A11   | 0.03        | 0.06        | 43154.34    | 1390.86     | 286.76      |
| B1A12   | 0.03        | 0.06        | 37008.93    | 993.85      | 226.41      |
| B1A13   | 0.03        | 0.06        | 25009.95    | 635.19      | 125.01      |

|       |      |      |          |         |        |
|-------|------|------|----------|---------|--------|
| B1A14 | 0.04 | 0.06 | 35211.37 | 1273.17 | 211.19 |
| B1A15 | 0.03 | 0.06 | 26093.99 | 475.69  | 114.85 |
| B1A16 | 0.03 | 0.06 | 29629.06 | 672.83  | 55.48  |
| B1A17 | 0.03 | 0.06 | 25461.55 | 802.38  | 165.52 |
| B1A18 | 0.02 | 0.05 | 33779.21 | 514.98  | 169.15 |
| B1A19 | 0.03 | 0.06 | 37880.03 | 827.83  | 106.70 |
| B1A20 | 0.04 | 0.05 | 33882.62 | 1375.13 | 373.72 |
| B1A21 | 0.06 | 0.05 | 32944.11 | 885.24  | 171.91 |
| B1A22 | 0.06 | 0.06 | 39807.71 | 1836.17 | 337.83 |
| B2A01 | 0.06 | 0.06 | 38526.29 | 1201.80 | 244.42 |
| B2A02 | 0.07 | 0.06 | 42461.89 | 1568.97 | 482.23 |
| B2A03 |      |      | 37505.74 | 1818.92 | 438.02 |
| B2A04 | 0.06 | 0.06 | 33934.62 | 1190.36 | 265.81 |
| B2A05 | 0.07 | 0.10 | 29813.10 | 1141.85 | 193.20 |
| B2A06 | 0.06 | 0.11 | 36722.57 | 1221.08 | 469.21 |
| B2A08 | 0.07 | 0.12 | 36026.71 | 788.19  | 351.98 |
| B2A09 | 0.07 | 0.12 | 36722.57 | 942.87  | 469.21 |
| B2A10 | 0.07 | 0.13 | 42461.89 | 1438.03 | 482.23 |
| B2A12 | 0.06 | 0.11 | 41702.10 | 1223.34 | 374.49 |
| B2A13 | 0.06 | 0.12 | 26889.50 | 1064.62 | 248.63 |
| B2A14 | 0.07 | 0.13 | 44643.47 | 1487.49 | 270.91 |
| B2A15 | 0.06 | 0.13 | 36026.71 | 1151.59 | 351.98 |
| B2A16 |      |      | 41777.16 | 1678.44 | 428.11 |
| B2A17 | 0.06 | 0.11 | 41702.10 | 1137.02 | 374.49 |
| B2A18 | 0.07 | 0.12 | 39395.67 | 1979.73 | 514.75 |
| B2A19 | 0.07 | 0.13 | 37206.71 | 1056.12 | 501.10 |
| B2A20 | 0.07 | 0.12 | 41777.16 | 1676.81 | 428.11 |
| B2A21 | 0.07 | 0.11 | 37505.74 | 1532.71 | 438.02 |
| B2A22 | 0.07 | 0.13 | 44643.47 | 1542.65 | 270.91 |
| B3A01 |      |      | 26002.24 | 943.85  | 344.66 |
| B3A02 |      |      | 22513.48 | 1162.09 | 437.29 |
| B3A03 |      |      | 46165.09 | 2594.30 | 524.24 |
| B3A04 |      |      | 30333.07 | 1228.64 | 368.13 |
| B3A05 |      |      | 37449.14 | 1917.70 | 437.31 |
| B3A06 |      |      | 33582.57 | 1240.35 | 471.13 |
| B3A07 |      |      | 31516.38 | 1817.48 | 591.75 |
| B3A08 |      |      | 32741.60 | 1278.43 | 497.79 |
| B3A09 |      |      | 40825.65 | 1665.38 | 506.88 |
| B3A11 |      |      | 38454.51 | 1628.30 | 537.62 |
| B3A12 |      |      | 30064.23 | 1407.20 | 439.69 |
| B3A13 |      |      | 39206.30 | 2063.96 | 545.73 |
| B3A14 |      |      | 34731.06 | 2302.69 | 584.30 |
| B3A16 |      |      | 33065.89 | 3102.65 | 571.26 |
| B3A17 |      |      | 31136.50 | 1152.06 | 631.62 |
| B3A19 |      |      | 27639.81 | 1168.50 | 422.47 |
| B3A20 |      |      | 26242.67 | 2227.34 | 529.66 |
| B3A21 |      |      | 29397.40 | 1837.83 | 585.28 |
| B3A22 |      |      | 41535.41 | 2209.44 | 734.92 |
| B3A23 |      |      | 44802.71 | 2282.87 | 601.73 |
| B3A24 |      |      | 44999.10 | 4158.09 | 641.63 |

|       |  |  |          |         |        |
|-------|--|--|----------|---------|--------|
| B4A01 |  |  | 44438.71 | 2190.32 | 752.93 |
| B4A02 |  |  | 33936.21 | 1514.17 | 470.10 |
| B4A04 |  |  | 32007.96 | 1354.48 | 532.41 |
| B4A06 |  |  | 32333.41 | 1457.52 | 517.49 |
| B4A07 |  |  | 41610.36 | 1604.47 | 765.81 |
| B4A08 |  |  | 36574.35 | 1348.45 | 429.94 |
| B4A09 |  |  | 27513.99 | 1898.67 | 601.65 |
| B4A10 |  |  | 41332.27 | 1770.80 | 626.64 |
| B4A11 |  |  | 44203.22 | 2190.53 | 578.74 |
| B4A12 |  |  | 29021.94 | 1091.97 | 461.03 |
| B4A13 |  |  | 32735.10 | 2131.44 | 362.12 |
| B4A14 |  |  | 40918.22 | 931.47  | 601.05 |
| B4A15 |  |  | 40905.16 | 2813.64 | 605.42 |
| B4A16 |  |  | 32091.48 | 1367.43 | 708.48 |
| B4A17 |  |  | 33278.16 | 1658.86 | 757.32 |
| B4A18 |  |  | 37955.60 | 2033.92 | 646.50 |
| B4A20 |  |  | 32001.22 | 2256.40 | 453.64 |
| B4A21 |  |  | 29058.73 | 2254.73 | 478.10 |
| B4A22 |  |  | 30522.54 | 1849.95 | 467.47 |

| Date  | 2013-09-17; | 2013-09-17; | 2013-09-17; | 2013-09-17; | 2013-09-17; |
|-------|-------------|-------------|-------------|-------------|-------------|
| Plot  |             |             |             |             |             |
| B1A01 | 0.07        | 0.11        | 10665800.97 | 339154.47   | 92700.17    |
| B1A02 | 0.07        | 0.12        | 7646054.45  | 341833.40   | 51274.58    |
| B1A03 |             |             | 8998036.22  | 279382.27   | 80168.91    |
| B1A04 | 0.07        | 0.12        | 8051363.45  | 115362.50   | 30280.83    |
| B1A05 | 0.05        | 0.07        | 5046012.92  | 138074.50   | 46818.09    |
| B1A06 | 0.06        | 0.08        | 11198616.20 | 170627.40   | 97659.75    |
| B1A07 |             |             | 6982844.93  | 177894.03   | 74806.68    |
| B1A08 |             |             | 6291016.42  | 172242.57   | 64127.01    |
| B1A11 | 0.03        | 0.08        | 12927716.73 | 333678.05   | 140618.64   |
| B1A12 | 0.04        | 0.07        | 7942389.09  | 175655.33   | 89601.14    |
| B1A13 | 0.05        | 0.07        | 6509442.41  | 154773.80   | 50498.58    |
| B1A14 |             |             | 9567242.59  | 412463.64   | 85383.41    |
| B1A15 |             |             | 5942032.97  | 75052.85    | 63939.76    |
| B1A16 | 0.05        | 0.08        | 8126882.38  | 177171.65   | 107000.41   |
| B1A17 | 0.05        | 0.06        | 6389824.99  | 146727.29   | 83740.33    |
| B1A18 | 0.04        | 0.08        | 6733734.45  | 171156.03   | 74149.73    |
| B1A19 | 0.06        | 0.07        | 9699145.30  | 130555.21   | 50325.60    |
| B1A20 | 0.06        | 0.08        | 9738097.31  | 630885.44   | 144717.37   |
| B1A21 | 0.05        | 0.08        | 8988438.47  | 289591.39   | 96555.91    |
| B1A22 | 0.04        | 0.08        | 11086266.57 | 642761.45   | 136159.69   |
| B2A01 | 0.05        | 0.06        | 9633085.58  | 228469.13   | 104927.77   |
| B2A02 | 0.03        | 0.08        | 9411233.85  | 414086.97   | 95577.05    |
| B2A03 | 0.05        | 0.08        | 11198425.94 | 285016.21   | 122612.83   |
| B2A04 | 0.04        | 0.10        | 5631714.13  | 117287.61   | 59575.41    |
| B2A05 | 0.04        | 0.10        | 5164766.29  | 178943.85   | 94822.12    |
| B2A06 | 0.03        | 0.07        | 10834506.27 | 284366.59   | 156493.32   |
| B2A08 | 0.03        | 0.10        | 5003700.54  | 198908.96   | 71042.91    |
| B2A09 | 0.03        | 0.11        | 9570872.74  | 248893.15   | 239237.72   |
| B2A10 | 0.04        | 0.09        | 11161731.61 | 367307.86   | 185160.93   |

|       |      |      |             |           |           |
|-------|------|------|-------------|-----------|-----------|
| B2A12 | 0.05 | 0.07 | 5312197.45  | 252760.12 | 40547.83  |
| B2A13 | 0.03 | 0.09 | 5312197.45  | 91023.30  | 40547.83  |
| B2A14 | 0.04 | 0.10 | 11386145.11 | 456825.21 | 135474.58 |
| B2A15 | 0.08 | 0.14 | 5003700.54  | 141404.93 | 71042.91  |
| B2A16 |      |      | 9063439.34  | 304920.15 | 137743.30 |
| B2A17 | 0.08 | 0.15 | 5631714.13  | 258936.61 | 59575.41  |
| B2A18 | 0.08 | 0.15 | 5164766.29  | 492433.41 | 94822.12  |
| B2A19 | 0.09 | 0.15 | 10350433.25 | 246551.63 | 158175.63 |
| B2A20 | 0.09 | 0.14 | 6339723.37  | 307466.04 | 142166.96 |
| B2A21 | 0.06 | 0.14 | 9570872.74  | 172370.12 | 239237.72 |
| B2A22 | 0.09 | 0.15 | 10834506.27 | 319880.68 | 156493.32 |
| B3A01 |      |      | 8335410.49  | 224470.14 | 147198.08 |
| B3A02 |      |      | 5319787.52  | 162697.15 | 123662.40 |
| B3A03 |      |      | 7835553.16  | 184309.92 | 136107.02 |
| B3A04 |      |      | 8584742.78  | 390183.75 | 96606.06  |
| B3A05 |      |      | 9668213.27  | 328436.19 | 182336.18 |
| B3A06 |      |      | 7918406.59  | 341074.47 | 157264.96 |
| B3A07 |      |      | 7452494.03  | 313469.07 | 166440.51 |
| B3A08 |      |      | 6749286.37  | 99438.57  | 110576.28 |
| B3A09 |      |      | 8671611.72  | 270598.12 | 154151.40 |
| B3A11 |      |      | 9761918.90  | 240629.26 | 113527.66 |
| B3A13 |      |      | 8259144.31  | 279491.12 | 125668.46 |
| B3A14 |      |      | 6339723.37  | 479458.77 | 142166.96 |
| B3A16 |      |      | 8631512.04  | 481990.41 | 162023.28 |
| B3A17 |      |      | 6923310.95  | 241027.42 | 140791.62 |
| B3A19 |      |      | 6162047.38  | 320957.47 | 133512.14 |
| B3A20 |      |      | 6490069.14  | 216098.58 | 133044.01 |
| B3A21 |      |      | 6574326.74  | 215870.81 | 89961.42  |
| B3A22 |      |      | 11159940.99 | 347311.15 | 209533.99 |
| B3A23 |      |      | 13146087.85 | 312685.02 | 160741.71 |
| B3A24 |      |      | 7684727.31  | 274749.66 | 141859.99 |
| B4A01 |      |      | 11792993.01 | 531794.29 | 256037.08 |
| B4A02 |      |      | 9184312.82  | 293127.84 | 144629.25 |
| B4A04 |      |      | 8211559.65  | 265469.46 | 154377.06 |
| B4A06 |      |      | 8336898.86  | 555473.53 | 167441.72 |
| B4A07 |      |      | 7384782.30  | 167979.32 | 133179.05 |
| B4A08 |      |      | 7858053.65  | 247533.15 | 133780.19 |
| B4A09 |      |      | 7271661.51  | 465201.47 | 159125.74 |
| B4A10 |      |      | 8384047.99  | 474918.60 | 166523.00 |
| B4A11 |      |      | 8267321.83  | 472110.30 | 180840.58 |
| B4A12 |      |      | 5204177.58  | 214835.16 | 144910.37 |
| B4A13 |      |      | 5510446.99  | 193569.39 | 98876.37  |
| B4A14 |      |      | 5977230.45  | 205380.96 | 128806.97 |
| B4A15 |      |      | 6144202.33  | 289903.68 | 162433.80 |
| B4A16 |      |      | 7998027.25  | 167176.21 | 206820.69 |
| B4A17 |      |      | 4880259.45  | 260747.66 | 96511.45  |
| B4A18 |      |      | 10149671.67 | 693304.84 | 221308.32 |
| B4A20 |      |      | 7507546.33  | 374901.23 | 144517.03 |
| B4A21 |      |      | 4940903.98  | 215225.61 | 95060.61  |
| B4A22 |      |      | 7747582.53  | 321906.80 | 177869.05 |

**Dataset**

| Enzyme activity of | Phosphatase  | Galactosidase | Sulfatase    | Tyrosin protease |
|--------------------|--------------|---------------|--------------|------------------|
| Type               | raw          | raw           | raw          | raw              |
| Unit               | nmol g-1 h-1 | nmol g-1 h-1  | nmol g-1 h-1 | nmol g-1 h-1     |
| Date(s)            | 2013-05-16;  | 2013-05-16;   | 2013-05-16;  | 2013-05-16;      |
| Plot               |              |               |              |                  |
| B1A01              | 739.62       | 3614.80       | 364.96       | 11496.09         |
| B1A02              | 56.96        | 896.95        | 225.29       | 10878.40         |
| B1A03              | 233.96       | 952.24        | 272.98       | 11201.96         |
| B1A04              | 524.85       | 2645.24       | 275.27       | 9275.86          |
| B1A05              |              |               |              |                  |
| B1A06              | 305.46       | 2061.32       | 434.35       | 11663.62         |
| B1A07              | 79.30        | 996.88        | 223.71       | 10490.44         |
| B1A08              | 375.88       | 1378.18       | 352.85       | 7364.52          |
| B1A11              | 543.41       | 2110.11       | 516.88       | 12905.63         |
| B1A12              | 251.16       | 911.97        | 263.25       | 12360.66         |
| B1A13              | 277.90       | 1664.10       | 238.54       | 7804.91          |
| B1A14              | 144.88       | 987.75        | 274.83       | 8360.04          |
| B1A15              | 482.93       | 1926.74       | 214.36       | 8944.98          |
| B1A16              | 80.09        | 747.63        | 302.04       | 10340.75         |
| B1A17              | 218.33       | 1889.52       | 207.25       | 7454.52          |
| B1A18              | 223.17       | 1475.48       | 306.73       | 10178.49         |
| B1A19              | 487.84       | 2726.55       | 440.56       | 12890.92         |
| B1A20              | 577.38       | 2328.43       | 656.03       | 10187.04         |
| B1A21              | 386.23       | 2323.38       | 311.91       | 10376.36         |
| B1A22              | 207.03       | 1397.73       | 360.44       | 15145.39         |
| B2A01              | 420.81       | 2138.46       | 79.91        | 11064.59         |
| B2A02              | 448.14       | 1802.51       | 177.78       | 11092.20         |
| B2A03              | 533.60       | 2314.05       | 145.59       | 11300.29         |
| B2A04              | 378.10       | 1586.86       | 86.08        | 9962.82          |
| B2A05              | 350.68       | 1495.12       | 51.46        | 8952.21          |
| B2A06              | 546.00       | 2433.81       | 145.59       | 11300.29         |
| B2A08              | 465.63       | 2316.80       | 100.91       | 11321.87         |
| B2A09              | 601.07       | 3247.65       | 80.09        | 13358.76         |
| B2A10              | 709.97       | 3480.01       | 25.68        | 15019.26         |
| B2A12              | 491.26       | 2438.44       | 23.34        | 13510.43         |
| B2A13              | 284.02       | 1493.55       | 23.34        | 13510.43         |
| B2A14              | 602.00       | 2331.02       | 47.91        | 8700.84          |
| B2A15              | 407.57       | 1392.29       | 47.91        | 8700.84          |
| B2A16              | 207.76       | 1541.46       | 25.92        | 9654.75          |
| B2A17              | 558.59       | 2552.87       | 25.68        | 15019.26         |
| B2A18              | 615.06       | 2509.08       | 86.08        | 9962.82          |
| B2A19              | 531.69       | 2122.89       | 417.88       | 12543.61         |
| B2A20              | 461.33       | 2106.32       | 88.47        | 13510.64         |
| B2A21              | 930.13       | 3366.00       | 88.47        | 13510.64         |
| B2A22              | 873.30       | 3326.71       | 51.46        | 8952.21          |
| B3A01              | 1005.57      | 1245.45       | 347.34       | 11522.05         |
| B3A02              | 444.37       | 2445.35       | 110.45       | 12218.59         |
| B3A03              | 1115.00      | 1631.38       | 370.56       | 15404.48         |

|             |             |             |             |             |
|-------------|-------------|-------------|-------------|-------------|
| B3A04       | 828.44      | 2401.96     | 144.22      | 11301.42    |
| B3A05       | 765.28      | 2765.36     | 125.19      | 12322.30    |
| B3A06       | 1433.82     | 1554.34     | 462.87      | 15126.06    |
| B3A07       | 427.39      | 2327.00     | 83.04       | 6396.63     |
| B3A08       | 560.81      | 2177.18     | 94.54       | 12278.89    |
| B3A09       | 1083.24     | 1805.35     | 318.24      | 13124.59    |
| B3A11       | 724.56      | 3206.76     | 134.13      | 18710.17    |
| B3A12       | 952.43      | 1143.01     | 252.81      | 8968.69     |
| B3A13       | 790.26      | 2617.93     | 53.66       | 9958.67     |
| B3A14       | 880.27      | 3215.83     | 124.54      | 12764.88    |
| B3A16       | 1111.59     | 3268.14     | 84.63       | 14462.39    |
| B3A17       | 1206.26     | 1500.86     | 348.76      | 14535.49    |
| B3A19       | 663.09      | 2437.76     | 108.96      | 14345.46    |
| B3A20       | 518.44      | 2719.06     | 72.61       | 16018.75    |
| B3A21       | 559.73      | 2003.19     | 85.99       | 9028.74     |
| B3A22       | 1923.13     | 2309.42     | 570.49      | 18529.51    |
| B3A23       | 765.28      | 2920.77     | 102.55      | 19367.60    |
| B3A24       | 923.50      | 3024.68     | 86.78       | 11178.66    |
| B4A01       | 1471.57     | 4509.22     | 69.29       | 11596.44    |
| B4A02       | 1225.18     | 4192.82     | 230.73      | 15161.48    |
| B4A04       | 1085.04     | 3675.15     | 115.64      | 12616.74    |
| B4A06       | 386.59      | -91.50      | 229.70      | 15500.07    |
| B4A07       | 1294.84     | 3706.05     | 85.38       | 11900.27    |
| B4A08       | 879.24      | 3276.13     | 111.58      | 8956.93     |
| B4A09       | 1392.90     | 3233.26     | 120.27      | 10261.72    |
| B4A10       | 1460.97     | 5329.89     | 134.87      | 11180.07    |
| B4A11       | 1349.24     | 3649.56     | 169.16      | 11270.10    |
| B4A12       | 671.62      | 2396.70     | 55.81       | 11038.36    |
| B4A13       | 795.55      | 2425.85     | 145.36      | 9523.44     |
| B4A14       | 1035.14     | 3407.83     | 166.68      | 14945.19    |
| B4A15       | 918.07      | 2885.91     | 192.89      | 13030.48    |
| B4A16       | 873.54      | 3372.08     | 80.42       | 11804.57    |
| B4A17       | 764.96      | 2536.36     | 124.95      | 10603.50    |
| B4A18       | 1346.54     | 4682.06     | 111.76      | 13591.26    |
| B4A20       | 950.86      | 3109.63     | 190.77      | 12575.72    |
| B4A21       | 747.12      | 2049.57     | 104.84      | 9739.91     |
| B4A22       | 1224.96     | 4036.77     | 138.52      | 10285.72    |
| 2013-07-01; | 2013-07-01; | 2013-07-01; | 2013-07-01; | 2013-07-01; |
| Plot        |             |             |             |             |
| B1A01       | 2094.00     | 4795.88     | -2.67       | 8767.21     |
| B1A02       | 328.39      | 1339.55     | 214.41      | 8334.51     |
| B1A03       | 2020.05     | 6186.71     | 204.96      | 7316.57     |
| B1A04       | 1174.11     | 3811.93     | 131.25      | 6128.58     |
| B1A05       | 1533.91     | 3662.67     | 47.25       | 5585.51     |
| B1A06       | 1674.34     | 3606.48     | 180.40      | 8098.47     |
| B1A07       | 851.29      | 2516.42     | 84.14       | 6316.50     |
| B1A08       | 1251.47     | 3110.93     | -0.36       | 5609.92     |
| B1A11       | 2156.33     | 4274.40     | 182.13      | 10646.12    |
| B1A12       | 1552.62     | 2858.45     | 63.87       | 8423.49     |
| B1A13       | 1095.49     | 2741.03     | 4.11        | 7121.96     |

|       |         |         |        |          |
|-------|---------|---------|--------|----------|
| B1A14 | 2057.74 | 3655.58 | 116.42 | 6055.39  |
| B1A15 | 185.74  | 2049.49 | -15.92 | 5977.23  |
| B1A16 | 1093.00 | 2582.38 | -36.03 | 6805.06  |
| B1A17 | 1239.49 | 3646.54 | 116.20 | 6549.62  |
| B1A18 | 171.63  | 2300.92 | 24.91  | 7135.43  |
| B1A19 | 1387.97 | 2747.41 | 56.02  | 9976.56  |
| B1A20 | 1927.64 | 7050.49 | 183.83 | 8572.49  |
| B1A21 | 917.66  | 3265.15 | 163.36 | 7785.69  |
| B1A22 | 2398.59 | 4801.47 | 215.93 | 8154.28  |
| B2A01 | 2073.27 | 3923.52 | 107.65 | 7710.78  |
| B2A02 | 2400.35 | 4773.29 | 174.93 | 9397.57  |
| B2A03 | 2191.95 | 4955.55 | 165.75 | 7972.35  |
| B2A04 | 2028.47 | 3640.89 | 68.59  | 7751.92  |
| B2A05 | 1433.88 | 3425.45 | 96.17  | 7549.91  |
| B2A06 | 2570.13 | 4928.55 | 128.40 | 8756.69  |
| B2A08 | 1388.38 | 3933.46 | 64.97  | 8940.57  |
| B2A09 | 1771.85 | 4427.72 | 128.40 | 8756.69  |
| B2A10 | 2292.05 | 4869.92 | 174.93 | 9397.57  |
| B2A12 | 1959.53 | 4488.24 | 244.96 | 9298.74  |
| B2A13 | 1263.74 | 2874.99 | 90.16  | 7760.25  |
| B2A14 | 1782.75 | 4644.11 | 59.14  | 10190.68 |
| B2A15 | 1633.14 | 2906.66 | 64.97  | 8940.57  |
| B2A16 | 2601.87 | 6291.52 | 124.83 | 11879.54 |
| B2A17 | 2379.13 | 4329.28 | 244.96 | 9298.74  |
| B2A18 | 2125.82 | 4947.68 | 228.06 | 9588.46  |
| B2A19 | 2464.46 | 5093.31 | 171.95 | 10055.14 |
| B2A20 | 1710.27 | 5494.83 | 124.83 | 11879.54 |
| B2A21 | 2533.73 | 5560.00 | 165.75 | 7972.35  |
| B2A22 | 3067.99 | 5446.58 | 59.14  | 10190.68 |
| B3A01 | 2954.12 | 4719.11 | 198.17 | 9229.83  |
| B3A02 | 1868.97 | 4123.44 | 169.73 | 7712.60  |
| B3A03 | 4975.82 | 7224.47 | 192.74 | 10821.96 |
| B3A04 | 2965.65 | 4577.03 | 136.95 | 8425.92  |
| B3A05 | 3643.29 | 7590.80 | 229.87 | 9137.71  |
| B3A06 | 2831.92 | 5360.45 | 187.00 | 9602.00  |
| B3A07 | 3086.01 | 5300.88 | 218.15 | 8986.73  |
| B3A08 | 3576.75 | 6134.34 | 153.81 | 11497.00 |
| B3A09 | 3321.13 | 5982.85 | 256.49 | 12080.95 |
| B3A11 | 4086.72 | 4751.69 | 132.92 | 13607.68 |
| B3A12 | 2358.69 | 4193.84 | 227.69 | 9013.22  |
| B3A13 | 3165.77 | 6397.43 | 213.41 | 10068.04 |
| B3A14 | 4913.33 | 7008.31 | 211.73 | 10573.70 |
| B3A16 | 6624.56 | 7674.89 | 271.55 | 8460.72  |
| B3A17 | 3701.24 | 5540.11 | 233.75 | 9628.02  |
| B3A19 | 2610.73 | 4874.72 | 135.46 | 8484.44  |
| B3A20 | 3878.82 | 7414.71 | 248.08 | 8436.22  |
| B3A21 | 3191.23 | 8364.15 | 160.69 | 11141.62 |
| B3A22 | 4263.20 | 9053.32 | 241.57 | 9794.04  |
| B3A23 | 6574.92 | 7162.42 | 176.82 | 9471.72  |
| B3A24 | 8113.03 | 9238.44 | 300.54 | 9776.43  |



|       |         |          |        |          |
|-------|---------|----------|--------|----------|
| B4A01 | 5599.93 | 7340.49  | 296.32 | 10631.83 |
| B4A02 | 3265.08 | 4661.07  | 189.50 | 8035.43  |
| B4A04 | 3145.36 | 4819.50  | 277.40 | 7273.19  |
| B4A06 | 4975.98 | 5429.87  | 242.04 | 7692.06  |
| B4A07 | 3303.92 | 4547.00  | 373.44 | 9588.26  |
| B4A08 | 4806.05 | 7782.00  | 305.47 | 9633.38  |
| B4A09 | 3649.76 | 5481.07  | 225.88 | 6579.91  |
| B4A10 | 4148.13 | 6059.00  | 277.17 | 10180.29 |
| B4A11 | 5067.74 | 8406.66  | 337.03 | 11836.09 |
| B4A12 | 3302.51 | 4247.21  | 130.17 | 9484.33  |
| B4A13 | 5284.03 | 8961.50  | 263.19 | 10582.11 |
| B4A14 | 3149.79 | 4785.27  | 155.54 | 8965.20  |
| B4A15 | 5671.37 | 10519.69 | 368.63 | 10785.90 |
| B4A16 | 2708.53 | 5109.03  | 238.99 | 7860.29  |
| B4A17 | 4116.44 | 5369.37  | 213.82 | 8425.84  |
| B4A18 | 3760.19 | 5502.23  | 227.28 | 10287.72 |
| B4A20 | 4423.60 | 7902.00  | 315.87 | 9972.76  |
| B4A21 | 7844.44 | 8665.59  | 291.41 | 8790.94  |
| B4A22 | 4873.60 | 9951.10  | 288.69 | 10179.66 |

|             |             |             |             |             |
|-------------|-------------|-------------|-------------|-------------|
| 2013-09-17; | 2013-09-17; | 2013-09-17; | 2013-09-17; | 2013-09-17; |
| Plot        |             |             |             |             |

|       |           |            |          |            |
|-------|-----------|------------|----------|------------|
| B1A01 | 396280.72 | 1195517.60 | 30333.72 | 2561866.76 |
| B1A02 | 236351.82 | 873394.55  | 25448.92 | 1795316.40 |
| B1A03 | 311555.96 | 758433.83  | 14326.41 | 1979110.70 |
| B1A04 | 5486.62   | 627041.80  | 20421.24 | 1979253.15 |
| B1A05 | 70203.65  | 695003.11  | 4456.67  | 1147331.02 |
| B1A06 | 201558.26 | 866142.10  | 44617.42 | 2490995.12 |
| B1A07 | 213352.94 | 657353.54  | 24674.40 | 2017256.82 |
| B1A08 | 278454.83 | 599528.23  | 19822.49 | 1697518.92 |
| B1A11 | 475766.09 | 1129545.69 | 34727.31 | 2872140.82 |
| B1A12 | 406082.30 | 831370.30  | 23361.82 | 2340903.54 |
| B1A13 | 124531.91 | 587824.12  | 18121.69 | 1775824.18 |
| B1A14 | 475658.36 | 876661.81  | 43744.62 | 2376924.50 |
| B1A15 | 94598.96  | 391666.41  | 16921.04 | 1680321.53 |
| B1A16 | 481046.40 | 790069.14  | 38807.49 | 2513644.69 |
| B1A17 | 220475.95 | 686077.37  | 13166.46 | 1782926.33 |
| B1A18 | 349943.64 | 914575.99  | 27209.26 | 1999111.96 |
| B1A19 | 119607.63 | 901004.33  | 21062.27 | 2355229.96 |
| B1A20 | 568764.02 | 1360222.50 | 51468.06 | 2572591.03 |
| B1A21 | 622895.40 | 941316.81  | 35116.20 | 2494216.77 |
| B1A22 | 676473.79 | 1502418.51 | 34769.36 | 2613113.18 |
| B2A01 | 358091.07 | 905703.92  | 32570.99 | 2457458.99 |
| B2A02 | 511455.18 | 967684.54  | 50591.34 | 2388884.89 |
| B2A03 | 386146.24 | 932811.68  | 56513.31 | 2689916.08 |
| B2A04 | 163809.26 | 466729.21  | 23504.60 | 1916844.84 |
| B2A05 | 162223.83 | 681247.54  | 36691.57 | 1636080.98 |
| B2A06 | 401369.92 | 846230.00  | 48209.64 | 2884173.47 |
| B2A08 | 438998.00 | 853383.48  | 37423.97 | 1695829.41 |
| B2A09 | 537931.05 | 1316357.88 | 74644.97 | 2971111.68 |
| B2A10 | 635575.39 | 1358386.96 | 60512.56 | 3112418.23 |

|       |            |            |          |            |
|-------|------------|------------|----------|------------|
| B2A12 | 502734.15  | 916770.00  | -4609.42 | 1415280.23 |
| B2A13 | 274824.14  | 588341.64  | -4609.42 | 1415280.23 |
| B2A14 | 346734.76  | 1173522.25 | 52178.85 | 3358623.27 |
| B2A15 | 258742.53  | 587140.63  | 37423.97 | 1695829.41 |
| B2A16 | 532798.02  | 1145396.35 | 70301.39 | 2546715.62 |
| B2A17 | 852690.12  | 1117917.07 | 23504.60 | 1916844.84 |
| B2A18 | 895093.44  | 1379398.20 | 36691.57 | 1636080.98 |
| B2A19 | 591291.34  | 1216953.15 | 64369.07 | 3318419.95 |
| B2A20 | 560683.38  | 954471.59  | 38166.89 | 2101564.59 |
| B2A21 | 383438.95  | 891879.27  | 74644.97 | 2971111.68 |
| B2A22 | 502046.93  | 1288516.67 | 48209.64 | 2884173.47 |
| B3A01 | 426393.66  | 1020131.35 | 41098.44 | 3029542.85 |
| B3A02 | 594563.34  | 764785.44  | 45199.50 | 2049134.91 |
| B3A03 | 579258.54  | 945188.21  | 41404.04 | 2355079.81 |
| B3A04 | 749319.45  | 971064.07  | 50429.34 | 2536147.83 |
| B3A05 | 800029.98  | 1242880.73 | 84930.81 | 2788054.54 |
| B3A06 | 749535.66  | 968609.99  | 65822.14 | 2454100.53 |
| B3A07 | 813634.73  | 1109942.11 | 55924.16 | 2010600.98 |
| B3A08 | 398487.79  | 812187.06  | 29977.02 | 2731135.20 |
| B3A09 | 578663.67  | 961242.51  | 79100.53 | 2571459.10 |
| B3A11 | 383030.88  | 812472.15  | 45423.12 | 3354849.94 |
| B3A13 | 911992.81  | 1095523.20 | 53389.24 | 2715547.11 |
| B3A14 | 1062934.44 | 1374157.62 | 38166.89 | 2101564.59 |
| B3A16 | 1099819.54 | 1484150.79 | 55273.17 | 2639496.99 |
| B3A17 | 864831.42  | 815038.96  | 55555.56 | 2893599.92 |
| B3A19 | 834673.18  | 982766.87  | 44375.31 | 2361665.57 |
| B3A20 | 570089.52  | 870804.08  | 49534.06 | 2362318.43 |
| B3A21 | 441815.44  | 822047.57  | 16697.87 | 2811769.91 |
| B3A22 | 937950.39  | 1244874.84 | 72303.62 | 3421225.07 |
| B3A23 | 754888.02  | 1179811.09 | 34566.33 | 3760226.60 |
| B3A24 | 959659.03  | 1080306.42 | 78428.98 | 1989763.94 |
| B4A01 | 1674029.55 | 1665118.51 | 76242.14 | 3587954.97 |
| B4A02 | 1374673.51 | 1360796.59 | 66281.00 | 3104582.31 |
| B4A04 | 1096440.72 | 1019191.00 | 65120.68 | 2510750.30 |
| B4A06 | 1385001.33 | 1668965.85 | 56289.02 | 2786171.66 |
| B4A07 | 956785.04  | 582789.26  | 36276.69 | 3088493.95 |
| B4A08 | 1079971.87 | 982011.57  | 58225.32 | 2728278.37 |
| B4A09 | 1457478.63 | 1111457.06 | 47194.31 | 2198959.64 |
| B4A10 | 1617175.42 | 1662596.66 | 57695.34 | 2763107.09 |
| B4A11 | 1633262.11 | 1403469.68 | 71107.03 | 2721354.82 |
| B4A12 | 1269210.42 | 739621.49  | 45200.39 | 1876842.86 |
| B4A13 | 1285968.66 | 859289.78  | 51488.83 | 2006741.93 |
| B4A14 | 1300259.71 | 1439915.49 | 46276.69 | 2109664.71 |
| B4A15 | 1258536.54 | 1006552.83 | 50939.02 | 2501551.84 |
| B4A16 | 748796.37  | 758105.29  | 50095.11 | 2450491.68 |
| B4A17 | 1180947.49 | 894932.62  | 41595.90 | 1737680.90 |
| B4A18 | 1646530.32 | 1509829.06 | 74017.40 | 3457888.86 |
| B4A20 | 1294531.27 | 1225883.77 | 41402.68 | 2665279.80 |
| B4A21 | 1329039.79 | 998707.78  | 35126.31 | 1736332.30 |
| B4A22 | 1420553.52 | 1407254.78 | 72887.77 | 2403471.23 |
